# Supplementary material for: Vacancy-fused multiple layers of copper sulfoselenide superstructures: a propitious HER electrocatalyst in acidic medium
Source: Royal Society of Chemistry journal article supplement (doi:10.1039/d2cy01336c), 2022-12-14
Supplement: d2cy01336c1.pdf [file d2cy01336c1.pdf]

## **Supporting Information for Publication**

# **Vacancy Fused Multiple Layers of Copper Sulfoselenide Superstructures: A Propitious HER Electrocatalyst in Acidic Medium**

**Sangeetha Kumaravel,<sup>†‡</sup> Dhirendra Kumar,<sup>§</sup> Selvasundarasekar Sam Sankar,<sup>†‡</sup> Arun Karmakar <sup>†‡</sup> Ragunath Madhu,<sup>†‡</sup> Krishnendu Bera,<sup>†‡</sup> Hariharan N Dhandapani,<sup>†‡</sup> Sreenivasan Nagappan,<sup>†‡</sup> Sudip Chakraborty,<sup>§,\*</sup> and Subrata Kundu<sup>†‡\*</sup>**

<sup>†</sup> *Electrochemical Process Engineering (EPE) Division, CSIR-Central Electrochemical Research Institute (CECRI), Karaikudi-630003, Tamil Nadu, India.*

<sup>‡</sup> *Academy of Scientific and Innovative Research (AcSIR), Ghaziabad-201002, India.*

<sup>§</sup> *Materials Theory for Energy Scavenging (MATES) Lab, Harish-Chandra Research Institute, A CI of Homi Bhabha National Institute, Chhatnag Road, Jhansi, Prayagraj-211019, India.*

\*To whom correspondence should be addressed, E-mail: [skundu@cecri.res.in](mailto:skundu@cecri.res.in); [kundu.subrata@gmail.com](mailto:kundu.subrata@gmail.com) and [sudipchakraborty@hri.res.in](mailto:sudipchakraborty@hri.res.in); Tel: +91 4565-241487.

This file contains pages from S1 to S27, where the detailed, reagents and instruments used in the study, figures and Tables corresponding to Cu<sub>2</sub>S-Se has been given.

**Number of Pages:** 27

**Number of Figures:** 18

**Number of Tables:** 01

| <b>Figures and Tables</b> | <b>Subject of the Figures</b>                                                                                                                                                           | <b>Page no.</b> |
|---------------------------|-----------------------------------------------------------------------------------------------------------------------------------------------------------------------------------------|-----------------|
| <b>S1</b>                 | <b>Synthesis scheme involves the formation of Cu<sub>2</sub>S and Cu<sub>2</sub>SSe by following hydrothermal methods</b>                                                               | <b>S7</b>       |
| <b>S1</b>                 | <b>Stacked XRD pattern of hydrothermally prepared Cu<sub>2</sub>S@Cu foam and Cu<sub>2</sub>S-Se@Cu foam and Zoomed XRD pattern of the same indicating the shift after selenization</b> | <b>S8</b>       |
| <b>S2</b>                 | <b>Low and high magnified FE-SEM images of hydrothermally prepared Cu<sub>2</sub>S nano-needles and Low and high magnified images of layered Cu<sub>2</sub>S-Se-Hyd sample</b>          | <b>S9</b>       |
| <b>S3</b>                 | <b>The HR-TEM image of layered structure of Cu<sub>2</sub>S-Se-Wet</b>                                                                                                                  | <b>S10</b>      |
| <b>S4</b>                 | <b>EDS analysis of the Wet-chemically prepare samples such as Cu<sub>2</sub>S-Hyd and Cu<sub>2</sub>S-Se-Hyd</b>                                                                        | <b>S11</b>      |
| <b>S5</b>                 | <b>EDS analysis of the hydrothermally prepare samples such as Cu<sub>2</sub>S-Hyd and Cu<sub>2</sub>S-Se-Hyd</b>                                                                        | <b>S12</b>      |
| <b>S6</b>                 | <b>HR-TEM image of layered Cu<sub>2</sub>S-Se-Wet and mixed HAADF elemental mapping of Cu<sub>2</sub>S-Se-Wet</b>                                                                       | <b>S13</b>      |
| <b>S7</b>                 | <b>XPS spectra of Cu<sub>2</sub>S-Se-Hyd; high-resolution images of Cu 2p; O 1s; S 2p and Se 3d</b>                                                                                     | <b>S14</b>      |
| <b>S8</b>                 | <b>Bar diagram for the overpotential comparison before and after cycling study</b>                                                                                                      | <b>S15</b>      |
| <b>S9</b>                 | <b>Post EIS study for Cu<sub>2</sub>S-Wet, Cu<sub>2</sub>S-Hyd, Cu<sub>2</sub>S-Se-Wet and Cu<sub>2</sub>S-Se-Hyd</b>                                                                   | <b>S16</b>      |

|                 |                                                                                                                                                                                              |            |
|-----------------|----------------------------------------------------------------------------------------------------------------------------------------------------------------------------------------------|------------|
| <b>S10</b>      | <b>Mass activity calculated at different current density and Turnover frequency (TOF) calculated at 300 mV overpotential</b>                                                                 | <b>S17</b> |
| <b>S11</b>      | <b>Faradaic efficiency calculated for Cu<sub>2</sub>S-Se-Wet and plot compared with theoretical calculation Vs time.</b>                                                                     | <b>S18</b> |
| <b>S12</b>      | <b>The potential Vs current density plot for all the four catalyst</b>                                                                                                                       | <b>S19</b> |
| <b>S13</b>      | <b>Total pDOS of Cu(111) plane</b>                                                                                                                                                           | <b>S20</b> |
| <b>S14</b>      | <b>Total pDOS of Cu<sub>2</sub>S-Se system</b>                                                                                                                                               | <b>S21</b> |
| <b>S15</b>      | <b>Low and High magnified post SEM images of layered structure of Cu<sub>2</sub>S-Se-Wet catalyst</b>                                                                                        | <b>S22</b> |
| <b>S16</b>      | <b>Post HR-TEM image of layered Cu<sub>2</sub>S-Se-Wet and mixed post HAADF elemental mapping of Cu<sub>2</sub>S-Se-Wet</b>                                                                  | <b>S23</b> |
| <b>S17</b>      | <b>Post EDS analysis of the wet-chemical sample Cu<sub>2</sub>S-Se-Wet</b>                                                                                                                   | <b>S24</b> |
| <b>S18</b>      | <b>Post XPS spectra of Cu<sub>2</sub>S-Se-Wet; high-resolution images of Cu 2p; O 1s; S 2p and Se 3d</b>                                                                                     | <b>S25</b> |
| <b>Table S1</b> | <b>Comparison of HER performance of Cu<sub>2</sub>S-Se-Wet catalyst with other transition metal based catalyst in terms of methodology, overpotential, Tafel slope, binder and substrate</b> | <b>S26</b> |

## Instruments used in the studies

Before and after selenization, the four set of catalyst such as CuS-Wet, CuS-Hyd, CuS-Se-Wet and CuS-Se-Hyd was characterized using the techniques such as XRD, FE-SEM, HR-TEM, EDS, HAADF, EPR and XPS analysis. The X-ray diffraction (XRD) analysis was carried using a PAN analytical Advanced Bragg-Brentano X-ray powder diffractometer (XRD) with Cu  $K_{\alpha}$  radiation ( $\lambda = 0.154178$  nm) with a scanning rate of  $0.020\text{ s}^{-1}$  in the  $2\theta$  range  $10\text{--}80^{\circ}$ . The morphological studies and the HAADF color mapping of both the electrocatalyst was carried in HR-TEM, (Tecnai<sup>TM</sup> G2TF20) working at an accelerating voltage of 200 kV. The Energy Dispersive X-ray Spectroscopy (EDS) analysis was done with the HR-TEM with a separate EDS detector (INCA) connected to that instrument. The X-ray photoelectron spectroscopic (XPS) analysis was done to check the state of elements present in the outermost part of materials and analyzed by using Theta Probe AR-XPS System, Thermo Fisher Scientific (U.K). The Electron ParaMagnetic Resonance (EPR) Spectroscopy, was performed in EMX Plus X Band with the software of Bruker WIN EPR Acquisition and Processing and the source used are microwaves. Further, the Field Emission Scanning Electron Microscope (FE-SEM) analysis was performed using SUPRA 55VP, Gemini Column with air lock system (Carl Zeiss, Germany). The entire HER study was carried out using Aut-M204 instrument. SCE (reference electrodes) was purchased from the Aut-M204 auto-lab instrument and the Pt (counter electrode) were purchased from Alfa- Aesar.

### **Materials used and sample preparation for various characterizations**

For the preparation of  $\text{Cu}_2\text{S}$  and  $\text{Cu}_2\text{S-Se}$ , the precursor used are sodium sulfide ( $\text{Na}_2\text{S}$ ) (98%), selenium (Se) metal powder (99.99%) and Sodium borohydride ( $\text{NaBH}_4$ ) (98%) was purchased from Sigma-Aldrich. Also, the Cu foam was procured from Alfa-aesar. The deionized water (DI) has been used for the complete study. After the formation of the catalyst, the various characterization studies were carried out such as XRD, FE-SEM, HR-TEM, EDS, HAADF, EPR and XPS analysis. For XRD, FE-SEM, EPR, and XPS analysis, the as prepared electrodes were directly taken for the studies. For HR-TEM, EDS and HAADF colour mapping, the catalyst such as  $\text{Cu}_2\text{S}$  and  $\text{Cu}_2\text{S-Se}$  developed over Cu foam was sonicated in DI water for 1 hour and the solution was straight away dropped over the copper coated carbon grid followed by steady evaporation at room temperature. The same has been studied for EDS and HAADF colour mapping with the separate detector system with the HR-TEM instrument.

### Mass activity calculation

Current observed in particular potential for the for **Cu<sub>2</sub>S-Wet**, **Cu<sub>2</sub>S-Hyd**, **Cu<sub>2</sub>S-Se-Wet** and **Cu<sub>2</sub>S-Se-Hyd** catalysts

Mass loading calculated for **Cu<sub>2</sub>S-Wet** and **Cu<sub>2</sub>S-Hyd** = 0.1 mg cm<sup>-2</sup>

Mass loading calculated for **Cu<sub>2</sub>S-Se-Wet** and **Cu<sub>2</sub>S-Hyd** = 0.2 mg cm<sup>-2</sup>

| Fixed Overpotential (V) | Current density of Cu <sub>2</sub> S-Wet in mA cm <sup>-2</sup> | Current density of Cu <sub>2</sub> S-Hyd in mA cm <sup>-2</sup> | Current density of Cu <sub>2</sub> S-Se-Wet in mA cm <sup>-2</sup> | Current density of Cu <sub>2</sub> S-Se-Hyd in mA cm <sup>-2</sup> |
|-------------------------|-----------------------------------------------------------------|-----------------------------------------------------------------|--------------------------------------------------------------------|--------------------------------------------------------------------|
| -0.3                    | -3.94                                                           | -3.96                                                           | -64.657-                                                           | -20.147                                                            |
| -0.35                   | -8.0                                                            | -8.0                                                            | -198.189                                                           | -60.611                                                            |
| -0.4                    | -37.551                                                         | -25.64                                                          | -534.352                                                           | -145.897                                                           |

Mass activity is calculated using the formulae,

$$\text{Mass activity} = \text{Current density/Loading of a catalyst}$$

Hence, the mass activity calculated all the four catalyst at high current density **-0.4 V**,

Mass activity calculated =  $-37.551/0.1 = 375.51$  mA/mg cm<sup>-2</sup> for **Cu<sub>2</sub>S-Wet**

Mass activity calculated =  $-25.64/0.1 = 25.64$  mA/mg cm<sup>-2</sup> for **Cu<sub>2</sub>S-Hyd**

Mass activity calculated =  $-534.352/0.2 = 2674.76$  mA/mg cm<sup>-2</sup> for **Cu<sub>2</sub>S-Se-Wet**

Mass activity calculated =  $-145.897/0.2 = 734.485$  mA/mg cm<sup>-2</sup> for **Cu<sub>2</sub>S-Se-Hyd**

### Hydrothermal method

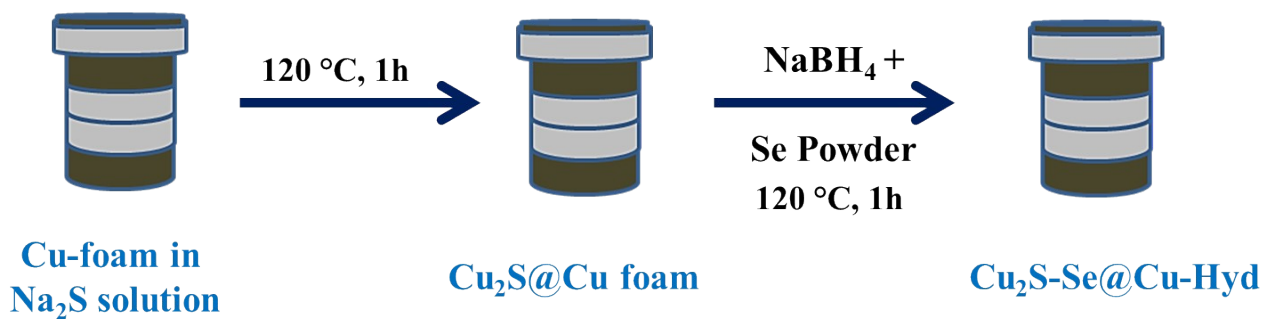

**Scheme S1.** Synthesis scheme involves the formation of Cu<sub>2</sub>S and Cu<sub>2</sub>S-Se by following hydrothermal methods.

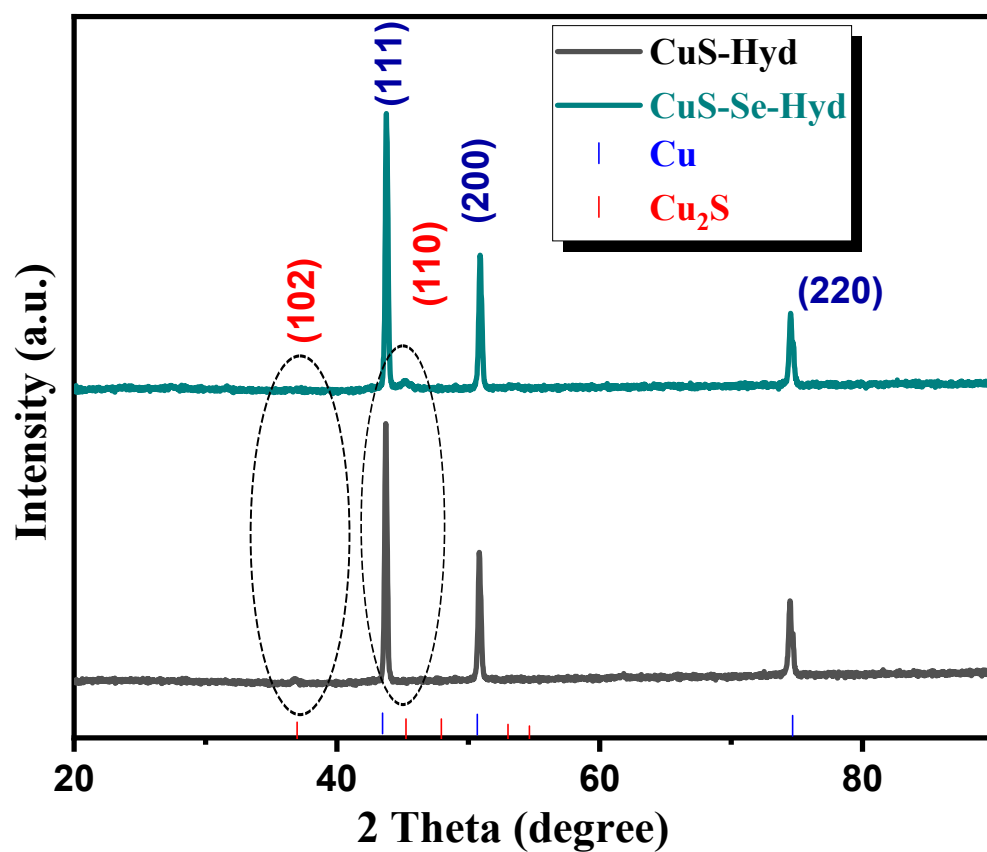

**Figure S1.** Stacked XRD pattern of hydrothermally prepared  $\text{Cu}_2\text{S}@Cu$  foam and  $\text{Cu}_2\text{S-Se}@Cu$  foam and (b) Zoomed XRD pattern of the same indicating the shift after selenization.

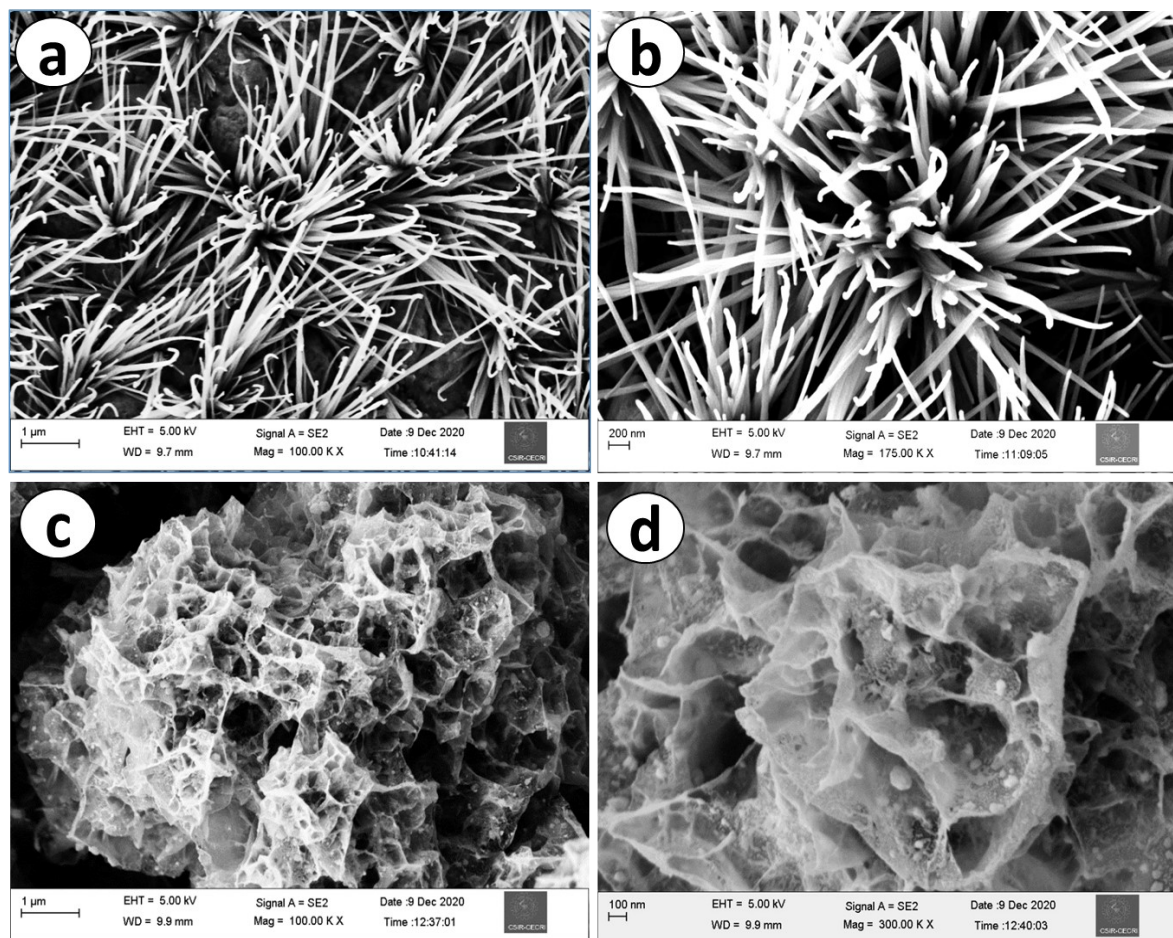

**Figure S2.** (a and b) Low and high magnified FE-SEM images of hydrothermally prepared  $\text{Cu}_2\text{S}$  nano-needles and (c and d) Low and high magnified images of layered  $\text{Cu}_2\text{S}$ -Se-Hyd sample.

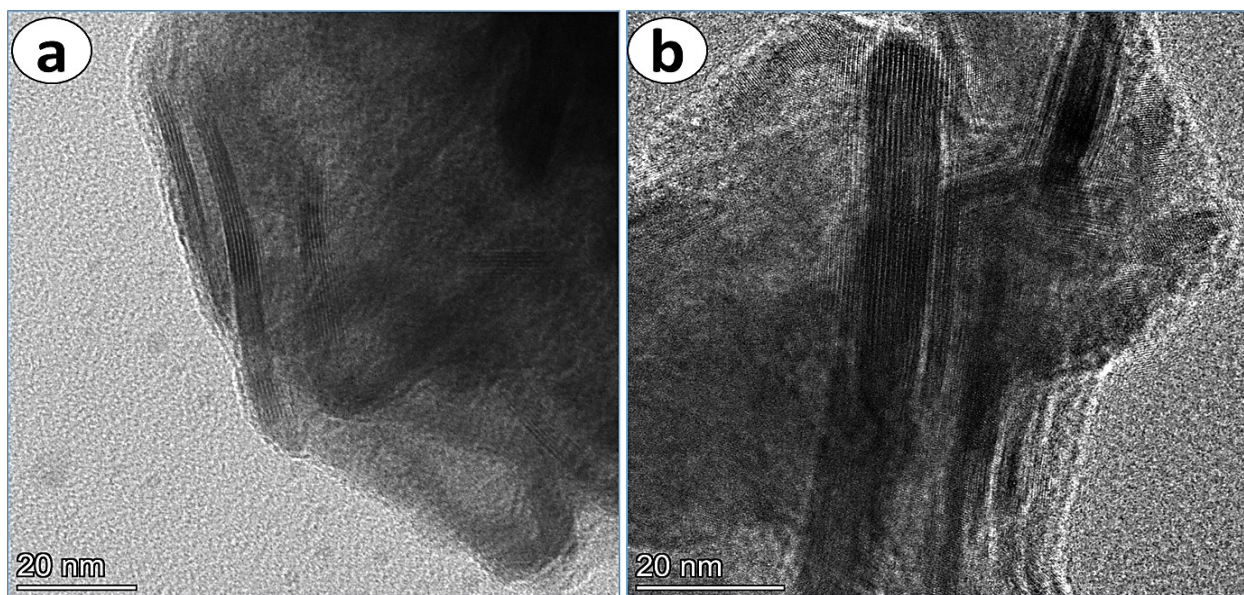

**Figure S3.** The HR-TEM image of layered structure of  $\text{Cu}_2\text{S-Se-Wet}$ .

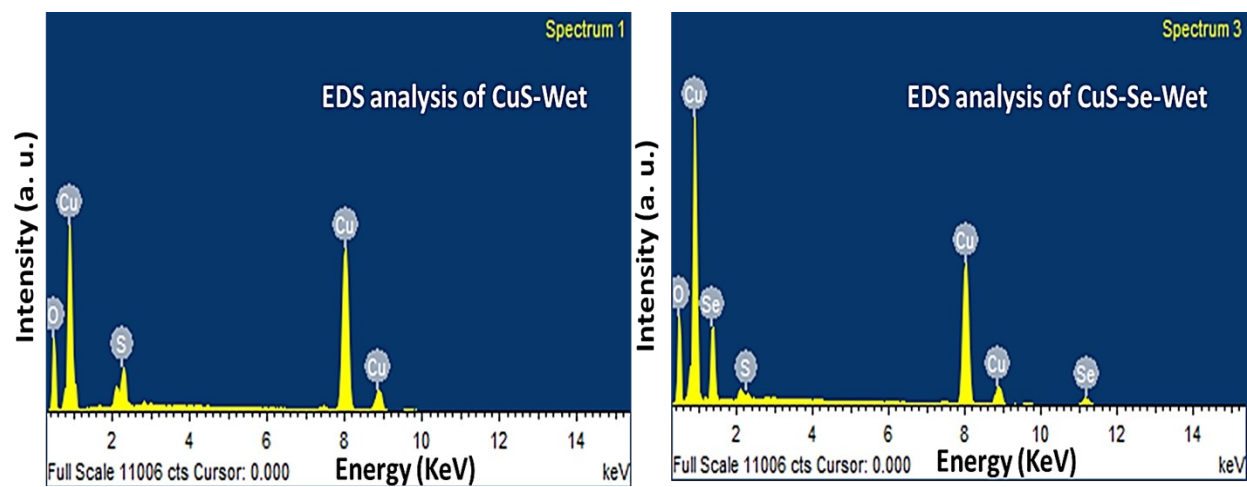

**Figure S4.** EDS analysis of the wet-chemically prepared samples such as  $\text{Cu}_2\text{S-Wet}$  and  $\text{Cu}_2\text{S-Se-Wet}$ .

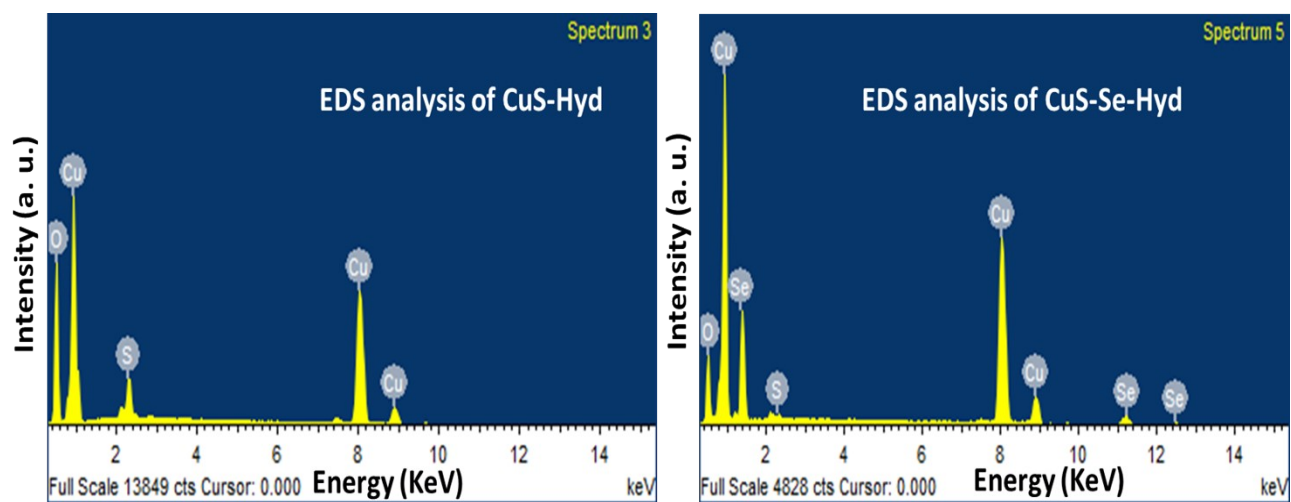

**Figure S5.** EDS analysis of the hydrothermally prepare samples such as  $\text{Cu}_2\text{S-Hyd}$  and  $\text{Cu}_2\text{S-Se-Hyd}$ .

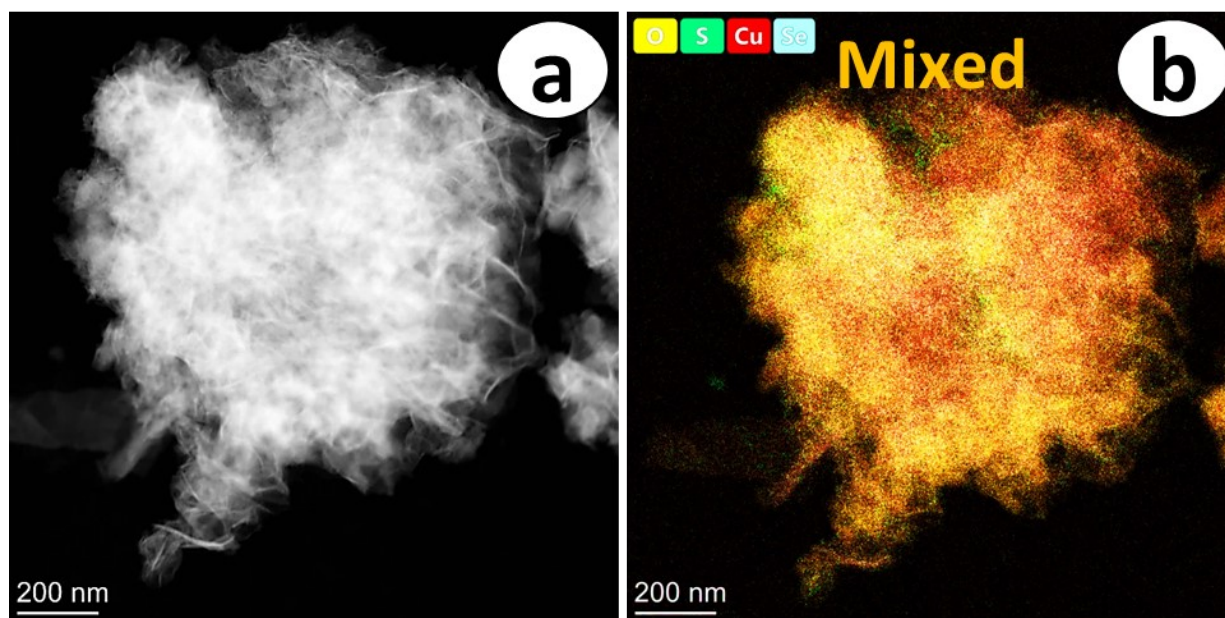

**Figure S6.** (a) HR-TEM image of layered  $\text{Cu}_2\text{S}$ -Se-Wet and (b) mixed HAADF elemental mapping of  $\text{Cu}_2\text{S}$ -Se-Wet.

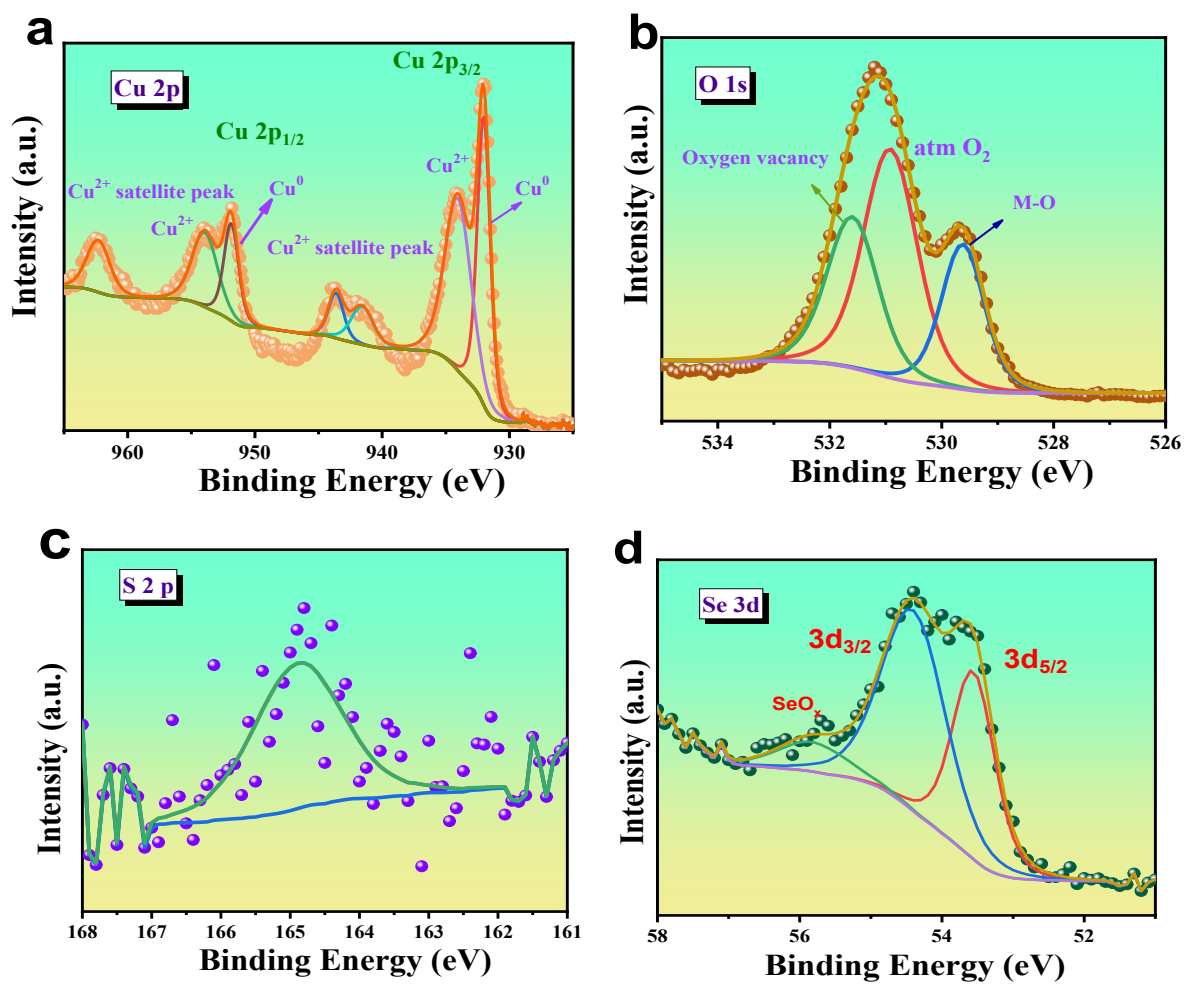

**Figure S7.** XPS spectra of  $\text{Cu}_2\text{S-Se-Hyd}$ ; high-resolution images of (a) Cu 2p; (b) O 1s; (c) S 2p and (d) Se 3d.

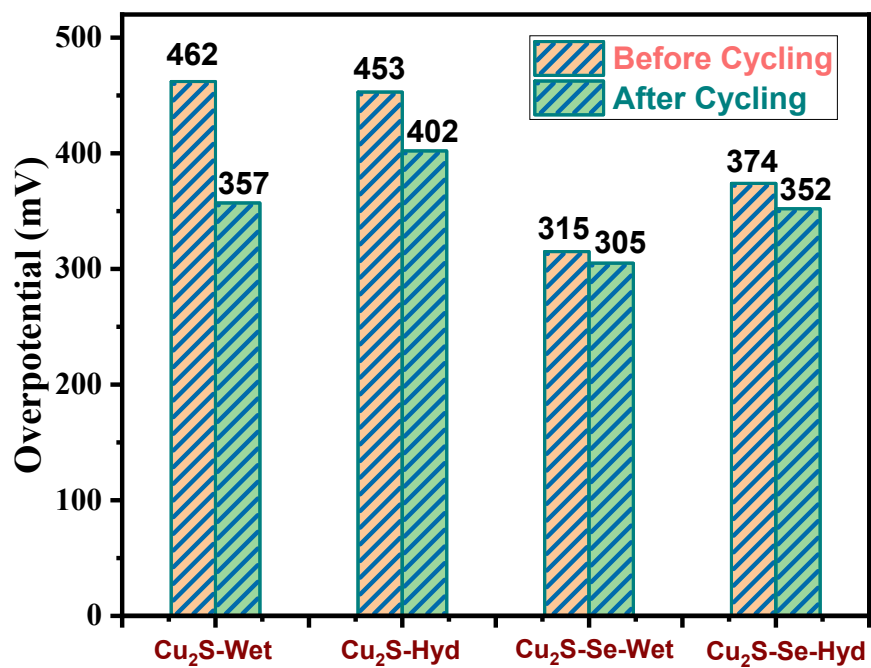

**Figure S8.** Bar diagram for the overpotential comparison before and after cycling study.

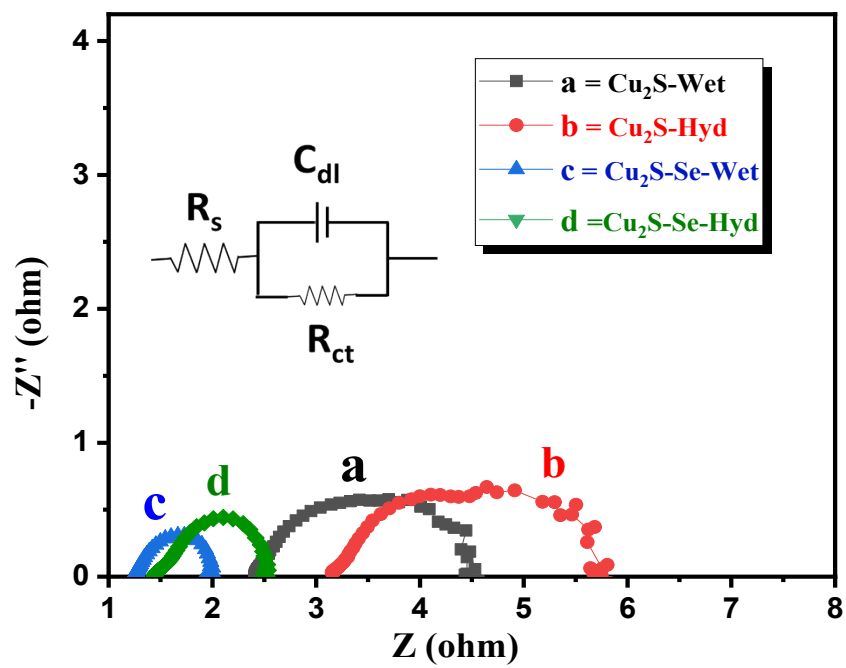

**Figure S9.** Post EIS study for  $\text{Cu}_2\text{S-Wet}$ ,  $\text{Cu}_2\text{S-Hyd}$ ,  $\text{Cu}_2\text{S-Se-Wet}$  and  $\text{Cu}_2\text{S-Se-Hyd}$ .

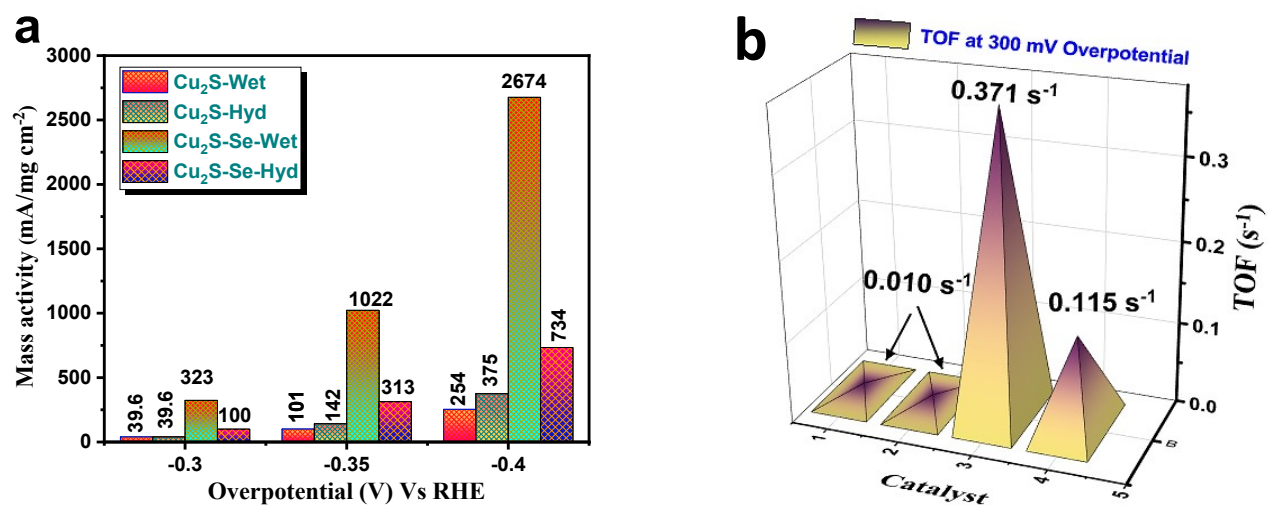

**Figure S10.** (a) Mass activity calculated at different current density and (b) Turnover frequency (TOF) calculated at 300 mV overpotential.

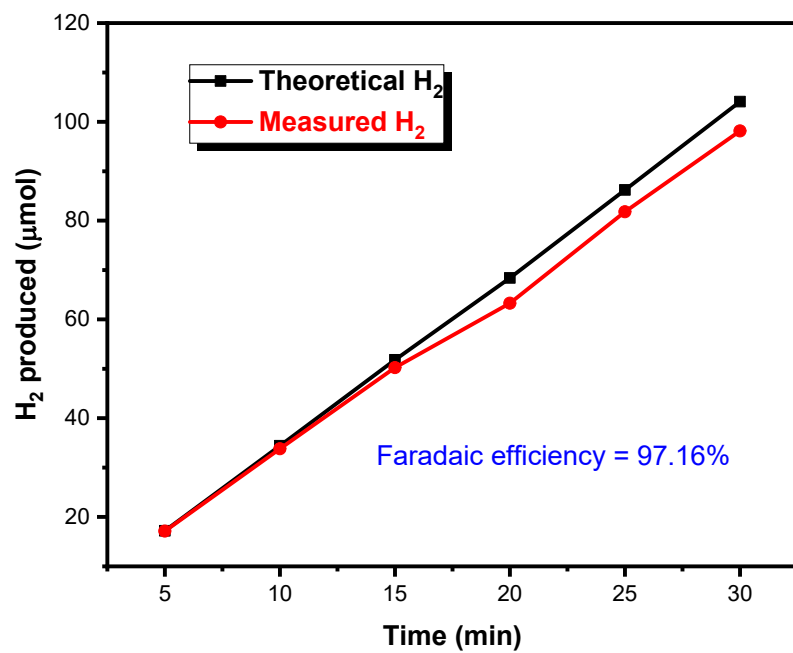

**Figure S11.** Faradaic efficiency calculated for Cu<sub>2</sub>S-Se-Wet and plot compared with theoretical calculation Vs time.

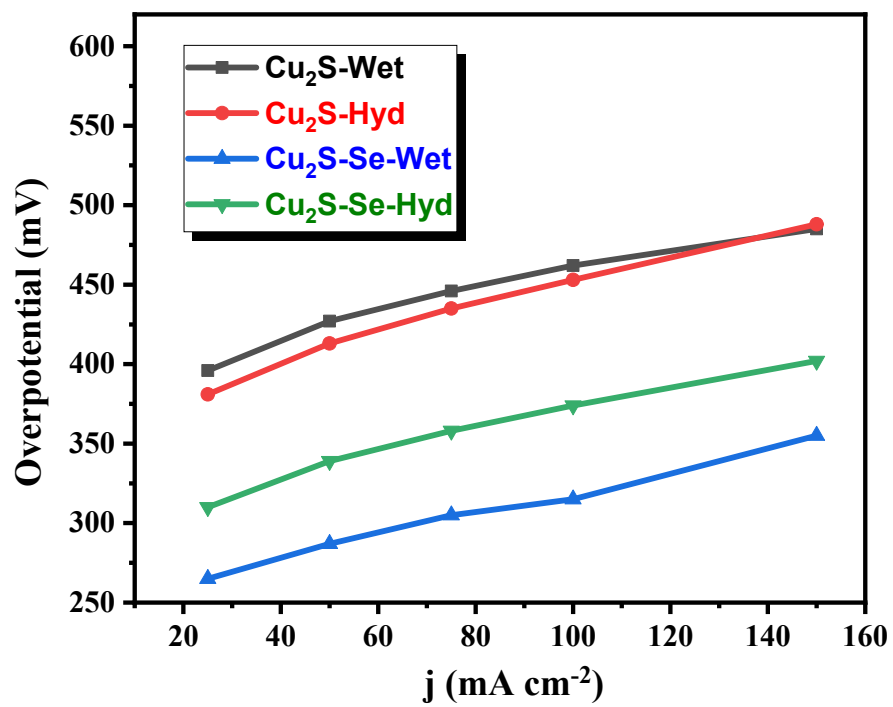

**Figure S12.** The potential  $V$ s current density plot for all the four catalyst.

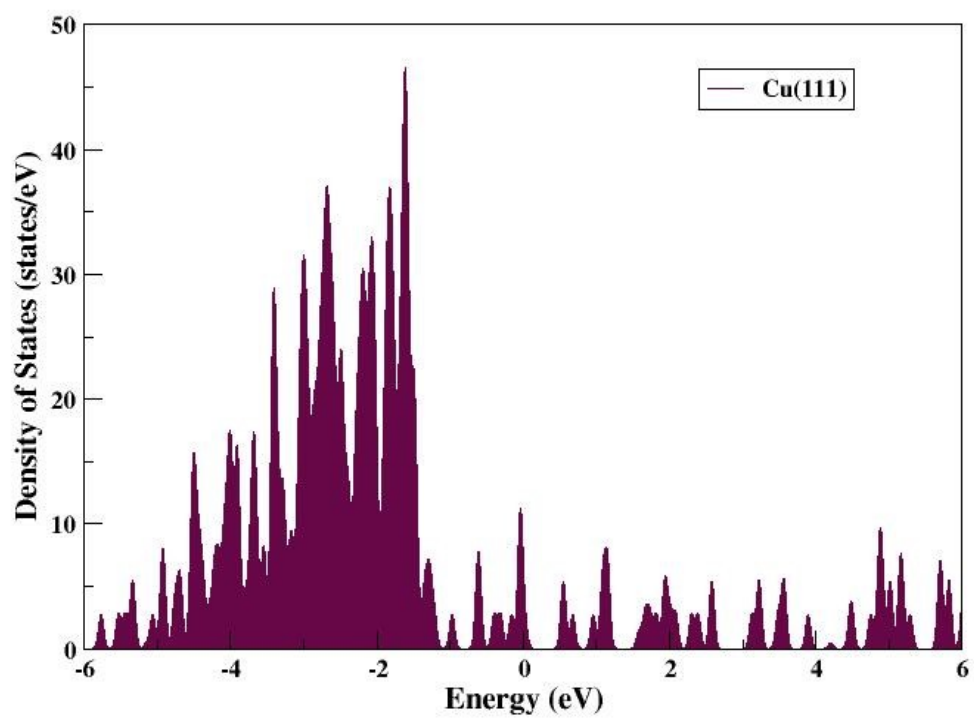

*Figure S13. Total pDOS of Cu(111) plane.*

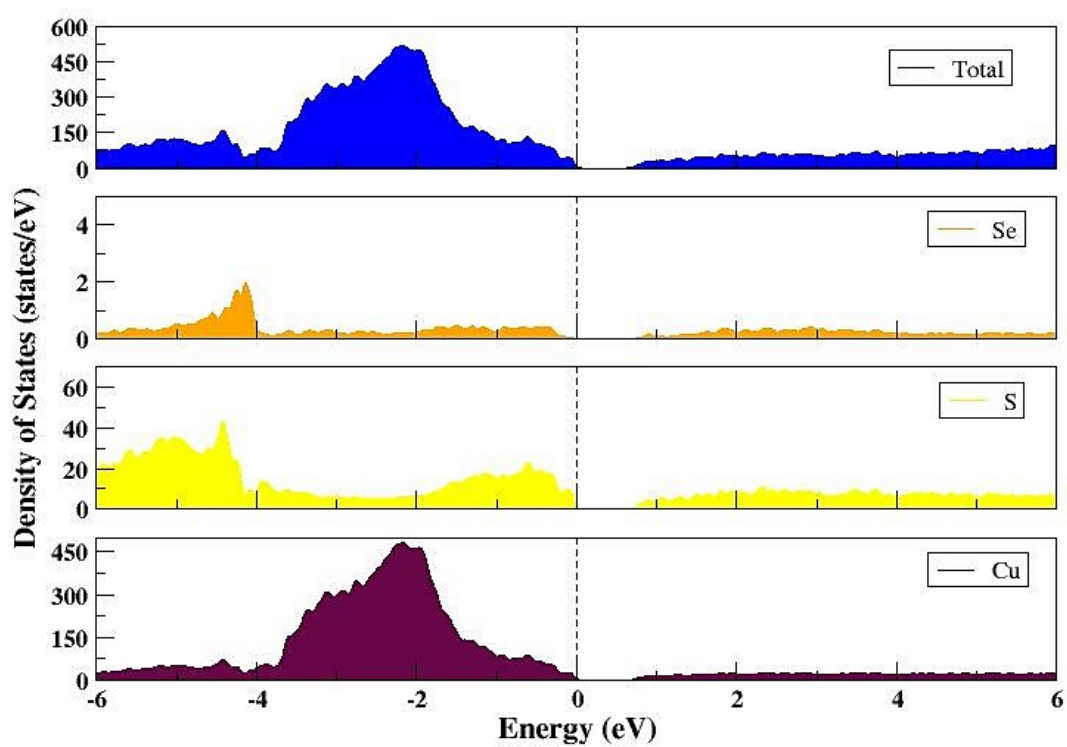

*Figure S14. Total pDOS of  $\text{Cu}_2\text{S-Se}$  system.*

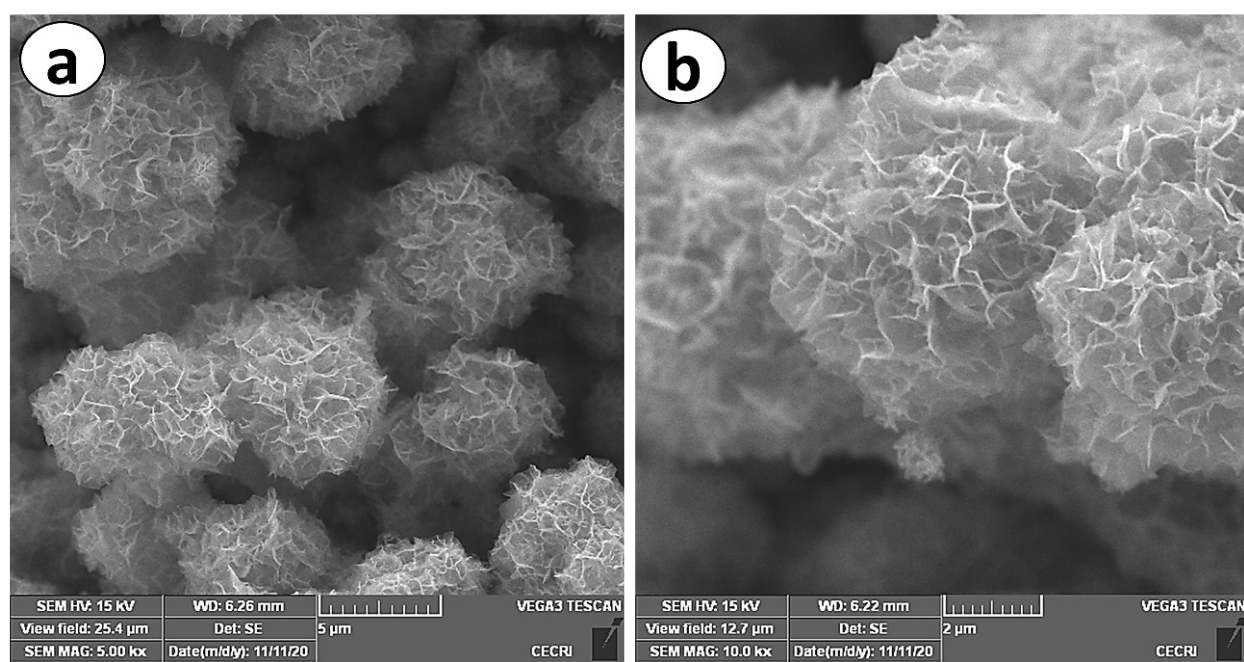

**Figure S15.** Low and High magnified post SEM images of layered structure of  $\text{Cu}_2\text{S-Se-Wet}$  catalyst.

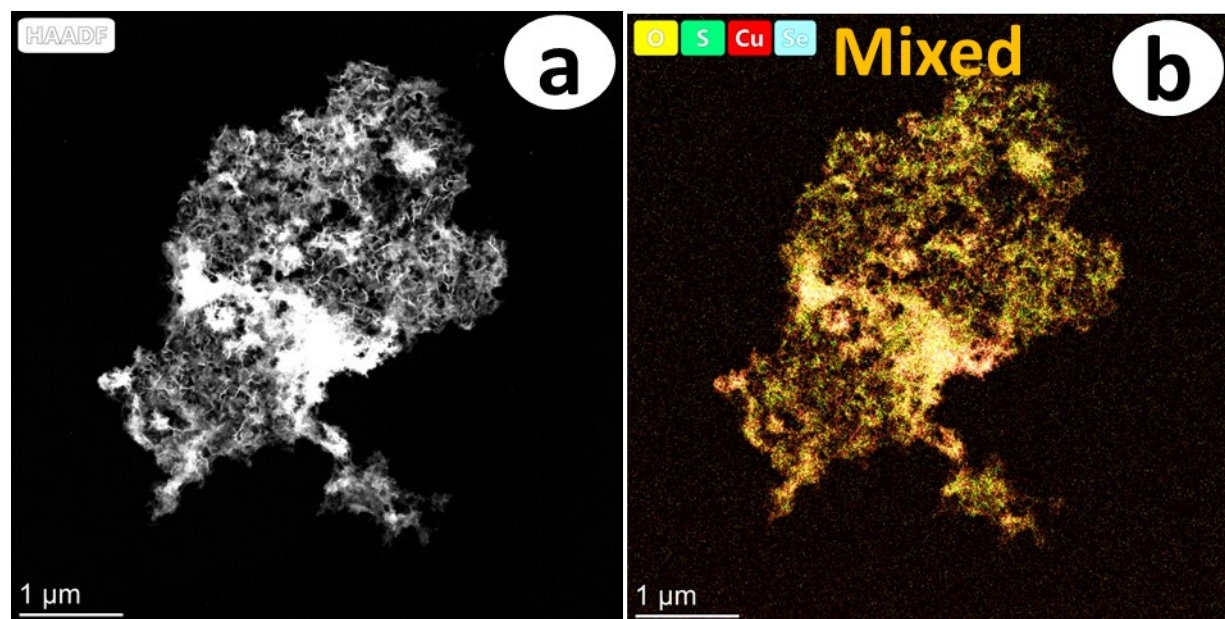

**Figure S16.** (a) Post HR-TEM image of layered  $\text{Cu}_2\text{S-Se-Wet}$ . (b) mixed post HAADF elemental mapping of  $\text{Cu}_2\text{S-Se-Wet}$ .

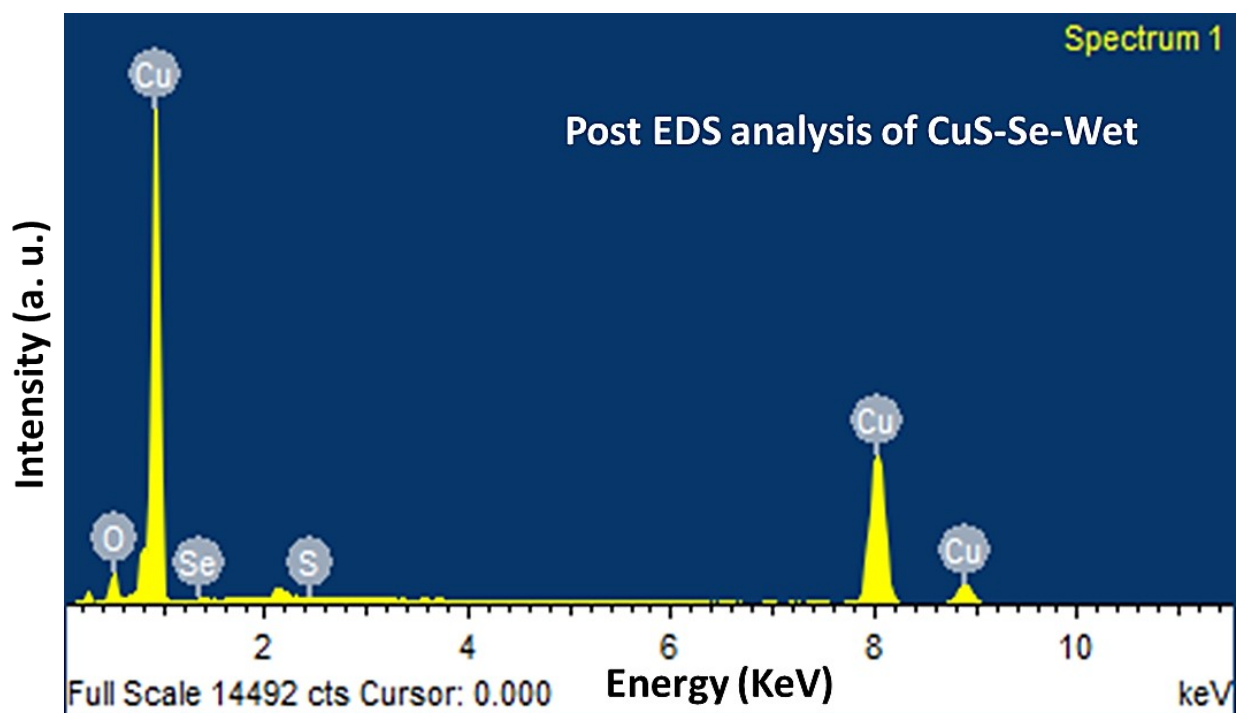

**Figure S17.** Post EDS analysis of the wet-chemical sample  $\text{Cu}_2\text{S}$ -Se-Wet.

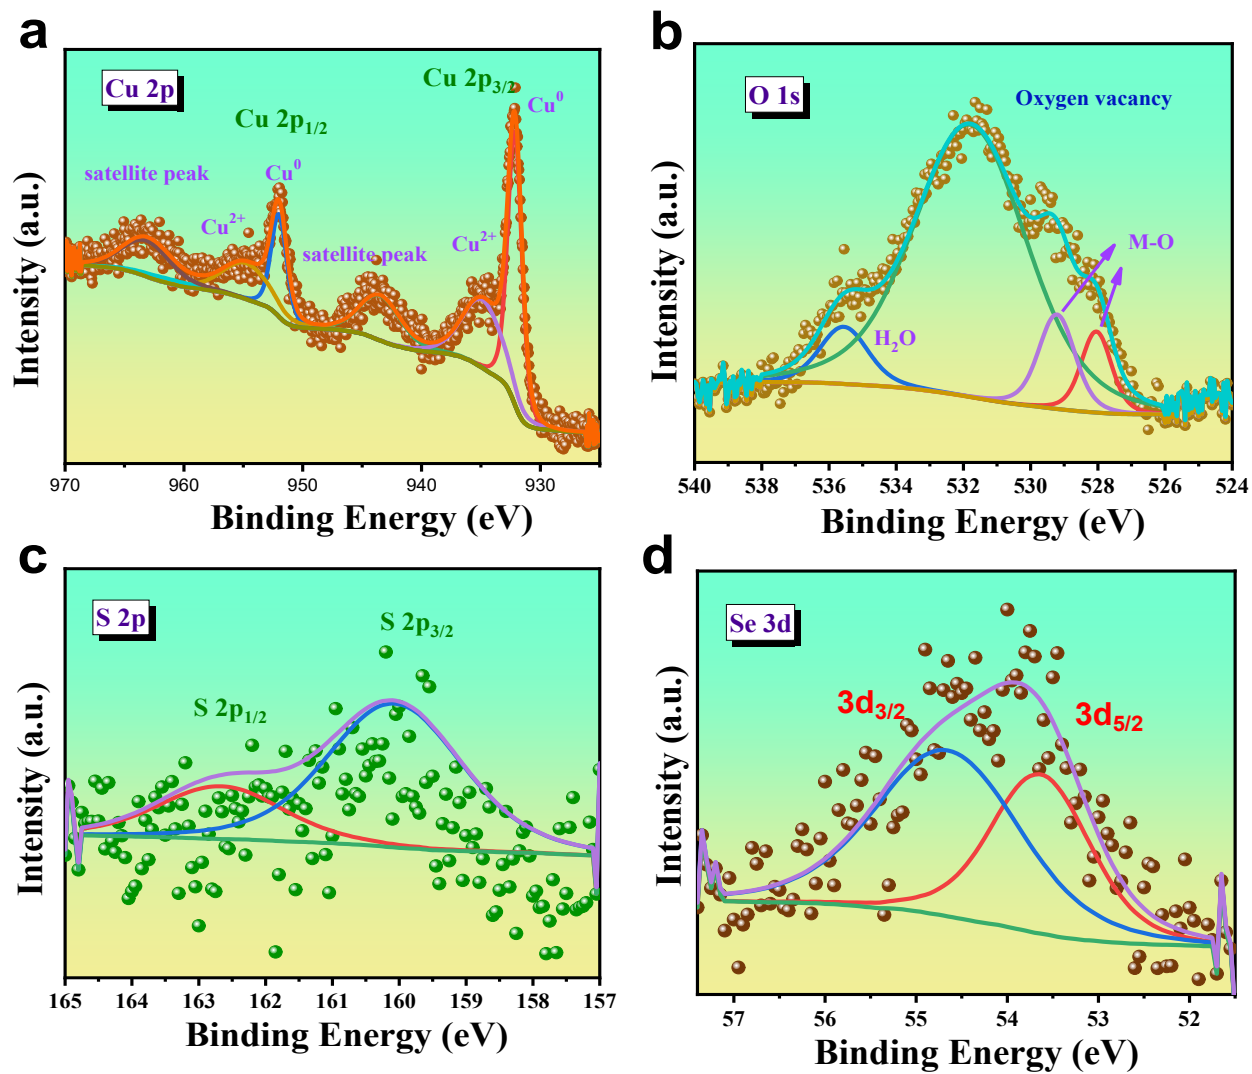

**Figure S18.** Post XPS spectra of Cu<sub>2</sub>S-Se-Wet; high-resolution images of (a) Cu 2p; (b) O 1s; (c) S 2p and (d) Se 3d.

**Table S1.** Comparison of HER performance of Cu<sub>2</sub>S-Se-Wet catalyst with other transition metal based catalyst in terms of methodology, overpotential, Tafel slope, binder and substrate.

| Catalysts                         | Synthesis methods          | Overpotential @ 10 mA cm <sup>-2</sup> | Tafel (mV/dec) | Binder | Substrate     | Reference |
|-----------------------------------|----------------------------|----------------------------------------|----------------|--------|---------------|-----------|
| NiCo <sub>2</sub> S <sub>4</sub>  | Hydrothermal               | 345 mV                                 | 60             | Nafion | Glassy Carbon | 1         |
| Cu <sub>2</sub> S                 | Hydrothermal               | 312 mV                                 | 49.79          | Nafion | Graphite rod  | 2         |
| NiS <sub>x</sub>                  | Atomic layer deposition    | 440 mV                                 | 62             | -      | FTO           | 3         |
| Ni-WSe <sub>2</sub>               | Wet chemical synthesis     | 259 mV                                 | 86             | Nafion | Glassy Carbon | 4         |
| MoS <sub>2</sub> Nanosheet arrays | Physical vapour deposition | 224 mV                                 | 58             | -      | Carbon Cloth  | 5         |
| NiS <sub>2</sub> /GS              | Chemical growth            | 240 mV                                 | 41             | -      | Graphite      | 6         |
| CoS <sub>2</sub>                  | Hydrothermal               | 254 mV                                 | 90             | Nafion | Glassy Carbon | 7         |
| CoSe <sub>2</sub>                 | Hydrothermal               | 125 mV                                 | 45             | -      | Ti foil       | 8         |
| $\alpha$ -NiS                     | Topotactic conversion      | 105 mV                                 | 40             | -      | Glassy Carbon | 9         |
| NiSe <sub>2</sub>                 | Solvothermal               | 147 mV                                 | 63             | NMP    | Carbon paper  | 10        |
| Cu <sub>2</sub> S-Se-Wet          | Wet-chemical               | 230 mV                                 | 97             | -      | Cu Foam       | This work |

## References

- 1 U. Aftab, A. Tahira, R. Mazzaro, V. Morandi, M. Ishaq Abro, M. M. Baloch, C. Yu and Z. H. Ibupoto, *RSC Adv.*, 2020, **10**, 22196–22203.
- 2 K. S. Bhat and H. S. Nagaraja, *J. Sci. Adv. Mater. Devices*, 2020, **5**, 361–367.
- 3 Y. Çimen, A. W. Peters, J. R. Avila, W. L. Hoffeditz, S. Goswami, O. K. Farha and J. T. Hupp, *Langmuir*, 2016, **32**, 12005–12012.
- 4 S. R. Kadam, A. N. Enyashin, L. Houben, R. Bar-Ziv and M. Bar-Sadan, *J. Mater. Chem. A*, 2020, **8**, 1403–1416.
- 5 X. Zhang, Y. Zhang, B. Bin Yu, X. L. Yin, W. J. Jiang, Y. Jiang, J. S. Hu and L. J. Wan, *J. Mater. Chem. A*, 2015, **3**, 19277–19281.
- 6 X. Wu, B. Yang, Z. Li, L. Lei and X. Zhang, *RSC Adv.*, 2015, **5**, 32976–32982.
- 7 R. A. Senthil, J. Pan, Y. Wang, S. Osman, T. R. Kumar and Y. Sun, *Ionics (Kiel)*, 2020, **26**, 6265–6275.
- 8 C. P. Lee, W. F. Chen, T. Billo, Y. G. Lin, F. Y. Fu, S. Samireddi, C. H. Lee, J. S. Hwang, K. H. Chen and L. C. Chen, *J. Mater. Chem. A*, 2016, **4**, 4553–4561.
- 9 X. Long, G. Li, Z. Wang, H. Zhu, T. Zhang, S. Xiao, W. Guo and S. Yang, *J. Am. Chem. Soc.*, 2015, **137**, 11900–11903.
- 10 Z. Li, X. Ma, L. Wu, H. Ye, L. Li, S. Lin, X. Zhang, Z. Shao, Y. Yang and H. Gao, *RSC Adv.*, 2021, **11**, 6842–6849.
